# Supplementary material for: Biotin-Decorated PAMAM G4.5 Dendrimer Nanoparticles to Enhance the Delivery, Anti-Proliferative, and Apoptotic Effects of Chemotherapeutic Drug in Cancer Cells
Source: PubMed Central journal article supplement (PMC7284937; doi:10.3390/pharmaceutics12050443), 2020-05-11

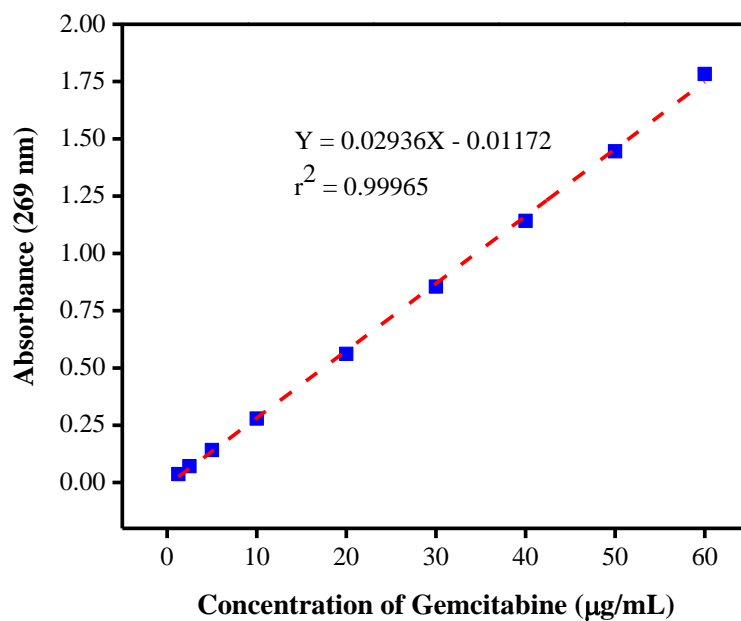

**Figure S1.** UV- Visible spectrophotometer study of gemcitabine. A) The absorbance of free gemcitabine at different concentration and B) The standard curve of free gemcitabine in PBS.

#### UV –Visible spectra of Fluorescein isothiocyanate (FITC)

PG4.5 –DETA-Biotin was tagged with FITC probe and the conjugation was characterized with UV-Visible spectrophotometer at 492 nm wavelength.

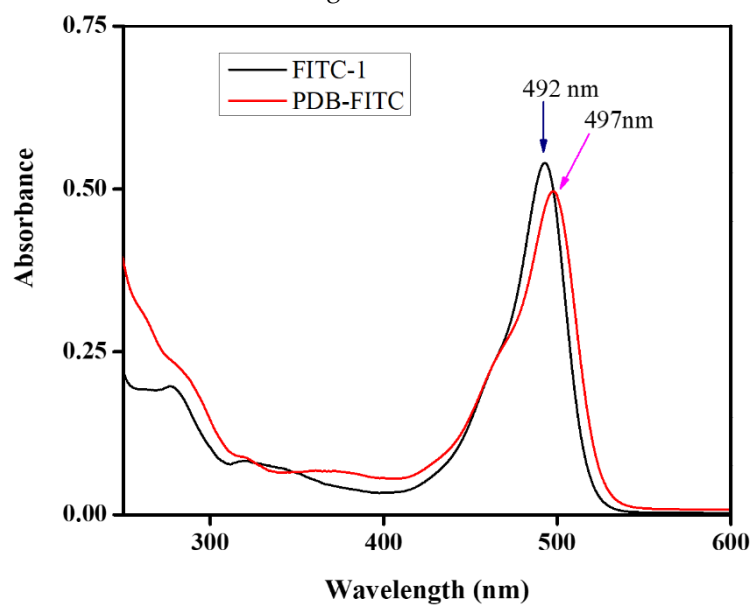

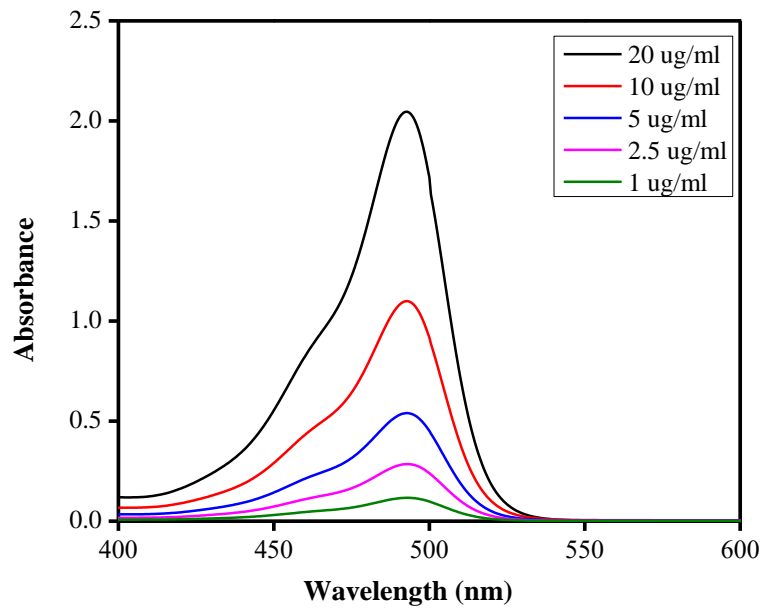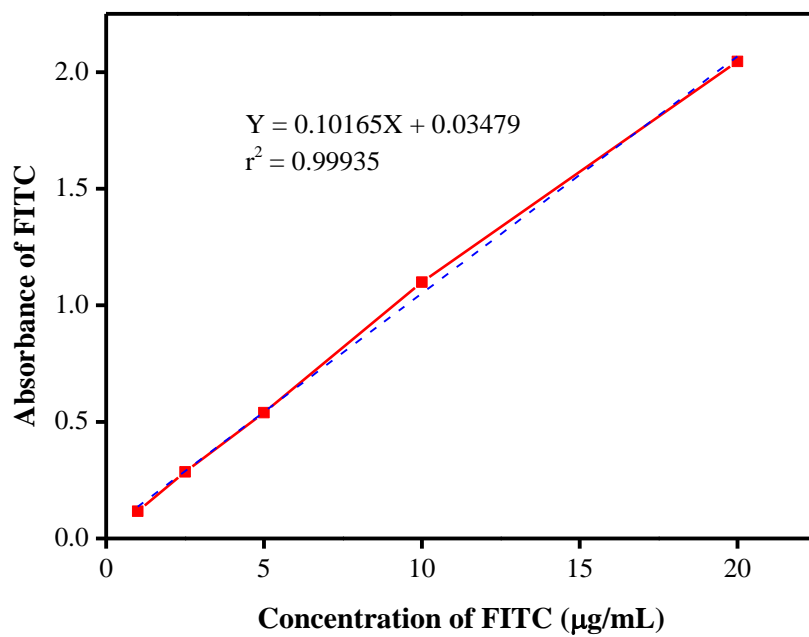

**Figure S2.** UV- Visible spectrophotometer study of FITC. A) The full adsorption wavelength spectrum of FITC and the PG4.5-DETA-Biotin B) The absorbance of FITC for different concentration and C) The standard curve of FITC in PBS.

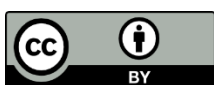

Supplement: pharmaceutics-12-00443-s001.pdf [file pharmaceutics-12-00443-s001.pdf]
